# Supplementary material for: Mouse sarcopenia model reveals sex- and age-specific differences in phenotypic and molecular characteristics
Source: PubMed Central journal article supplement (PMC11324300; doi:10.1172/jci172890), 2024-06-11
Supplement: jci-134-172890-s164.pdf [file jci-134-172890-s164.pdf]

# Western blots

For the following paper:

Mouse Sarcopenia Model Reveals Sex- and Age-Specific Differences in Phenotypic and Molecular Characteristics

Haiming L. Kerr<sup>1</sup>, Kora Krumm<sup>1</sup>, Barbara Anderson<sup>1</sup>, Anthony Christiani<sup>1</sup>, Lena Strait<sup>1</sup>, Theresa Li<sup>1</sup>, Brynn Irwin<sup>1</sup>, Siyi Jiang<sup>1</sup>, Artur Rybachok<sup>1</sup>, Amanda Chen<sup>1</sup>, Elizabeth Dacek<sup>1</sup>, Lucas Caeiro<sup>1</sup>, Gennifer E. Merrihew<sup>2</sup>, James W. MacDonald<sup>3</sup>, Theo K. Bammler<sup>3</sup>, Michael J. MacCoss<sup>2</sup>, Jose M. Garcia<sup>1</sup>

<sup>1</sup>Geriatric Research, Education and Clinical Center, Veterans Affairs Puget Sound Health Care System, Seattle, WA 98108, USA; Gerontology and Geriatric Medicine, University of Washington Department of Medicine, Seattle, WA 98195, USA.

<sup>2</sup>Department of Genome Sciences, University of Washington, Seattle, WA 98195, USA

<sup>3</sup>Department of Environmental and Occupational Health Sciences, University of Washington, Seattle, WA 98195, USA

# Full unedited blots for Figure 4D

## OXPHOS complexes

|           |        |        |        |        |       |       |       |       |    |    |    |    |    |    |
|-----------|--------|--------|--------|--------|-------|-------|-------|-------|----|----|----|----|----|----|
| 1         | 2      | 3      | 4      | 5      | 6     | 7     | 8     | 9     | 10 | 11 | 12 | 13 | 14 | 15 |
| Blot ctrl | Youn g | Youn g | Youn g | Youn g | Non-S | Non-S | Non-S | Non-S | PS | PS | PS | S  | S  | S  |

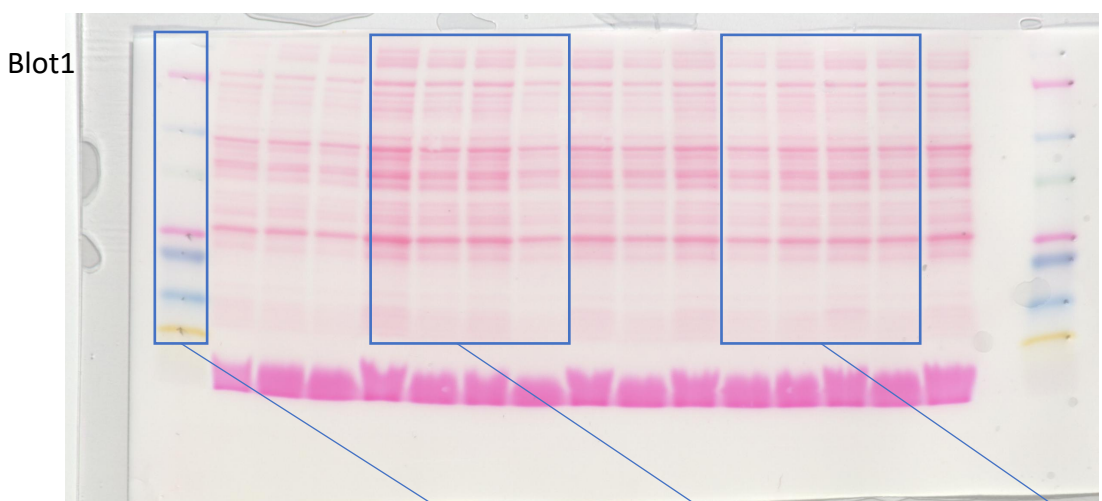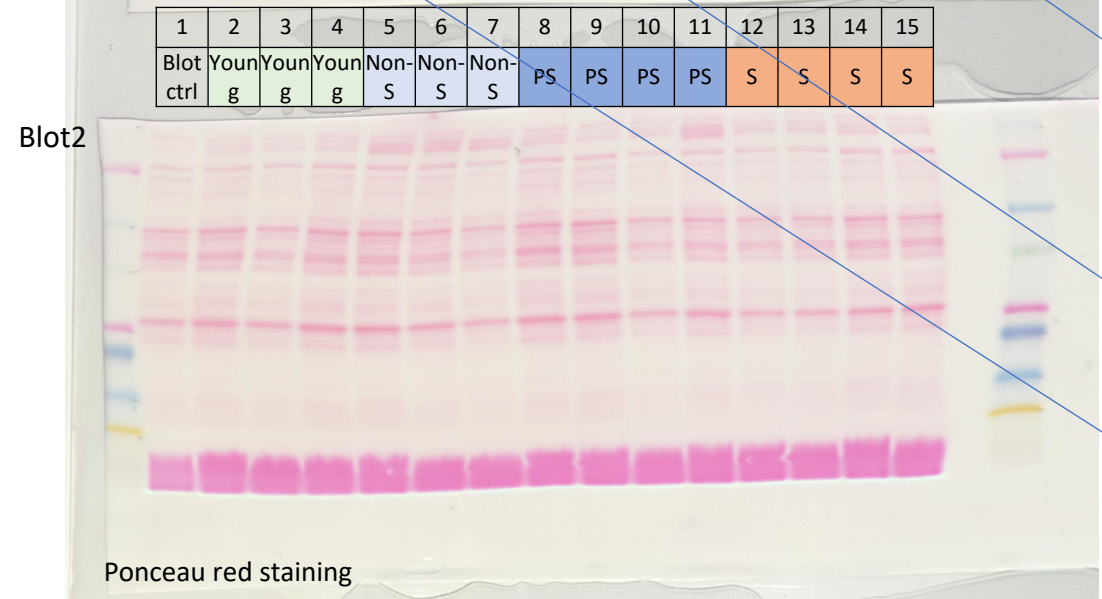

|           |        |        |        |       |       |       |    |    |    |    |    |    |    |    |
|-----------|--------|--------|--------|-------|-------|-------|----|----|----|----|----|----|----|----|
| 1         | 2      | 3      | 4      | 5     | 6     | 7     | 8  | 9  | 10 | 11 | 12 | 13 | 14 | 15 |
| Blot ctrl | Youn g | Youn g | Youn g | Non-S | Non-S | Non-S | PS | PS | PS | PS | S  | S  | S  | S  |

|           |        |        |        |       |       |       |       |    |    |    |    |    |    |    |
|-----------|--------|--------|--------|-------|-------|-------|-------|----|----|----|----|----|----|----|
| 1         | 2      | 3      | 4      | 5     | 6     | 7     | 8     | 9  | 10 | 11 | 12 | 13 | 14 | 15 |
| Blot ctrl | Youn g | Youn g | Youn g | Non-S | Non-S | Non-S | Non-S | PS | PS | PS | S  | S  | S  | S  |

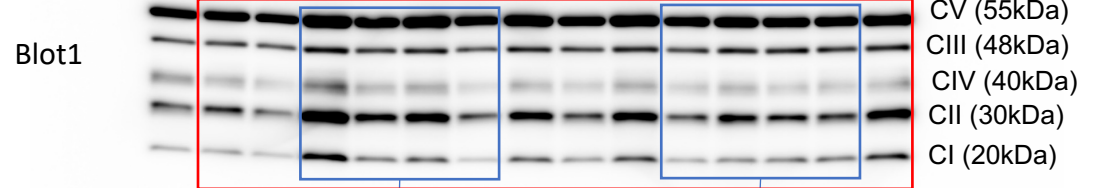

|           |        |        |        |       |       |       |    |    |    |    |    |    |    |    |
|-----------|--------|--------|--------|-------|-------|-------|----|----|----|----|----|----|----|----|
| 1         | 2      | 3      | 4      | 5     | 6     | 7     | 8  | 9  | 10 | 11 | 12 | 13 | 14 | 15 |
| Blot ctrl | Youn g | Youn g | Youn g | Non-S | Non-S | Non-S | PS | PS | PS | PS | S  | S  | S  | S  |

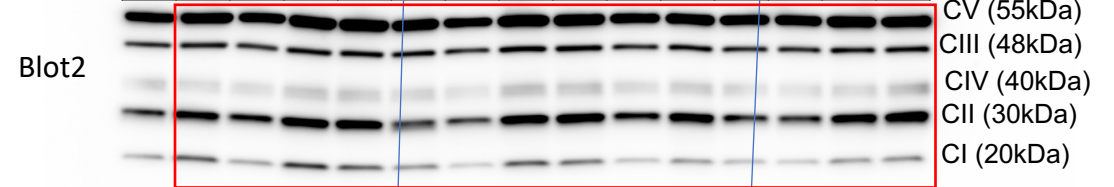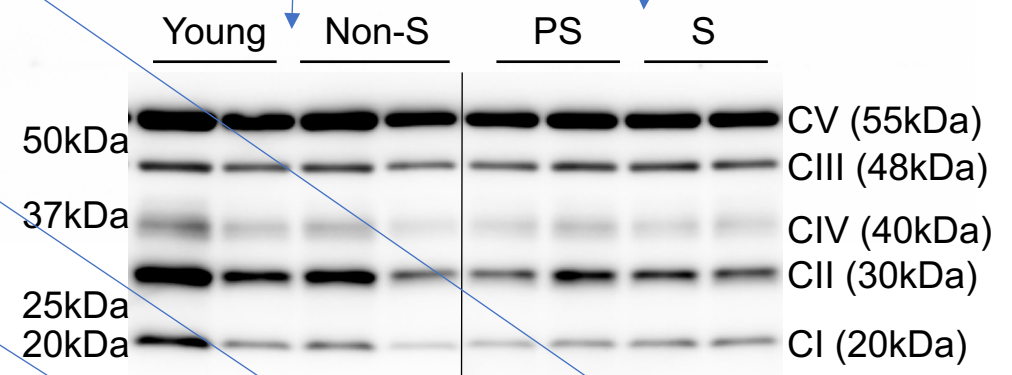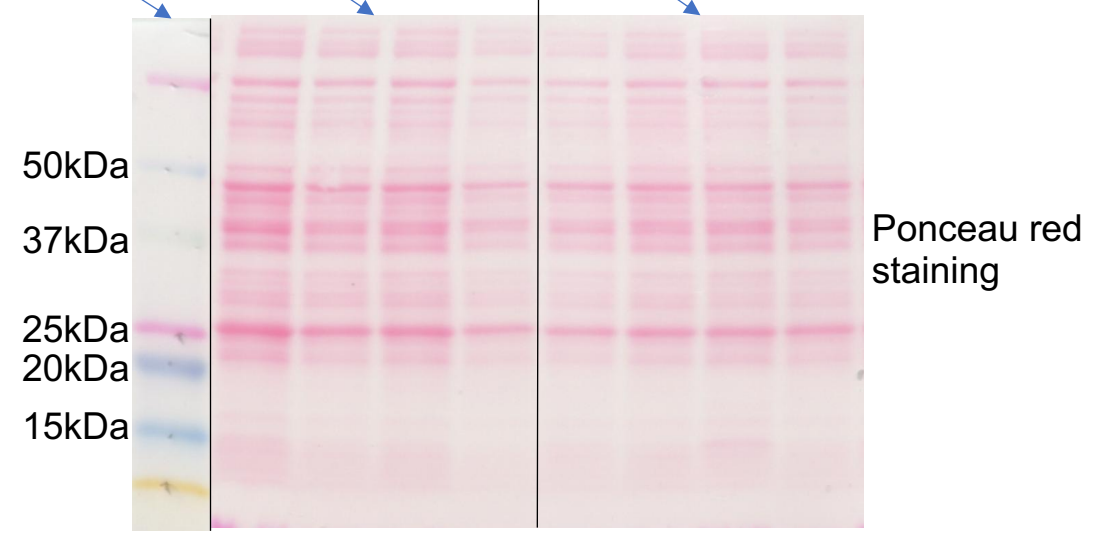

Representative blots

Used for data analysis

Blots are shown in Fig. 4D

**Full unedited blots for Figure 5C**  
**PGC1a blot1**

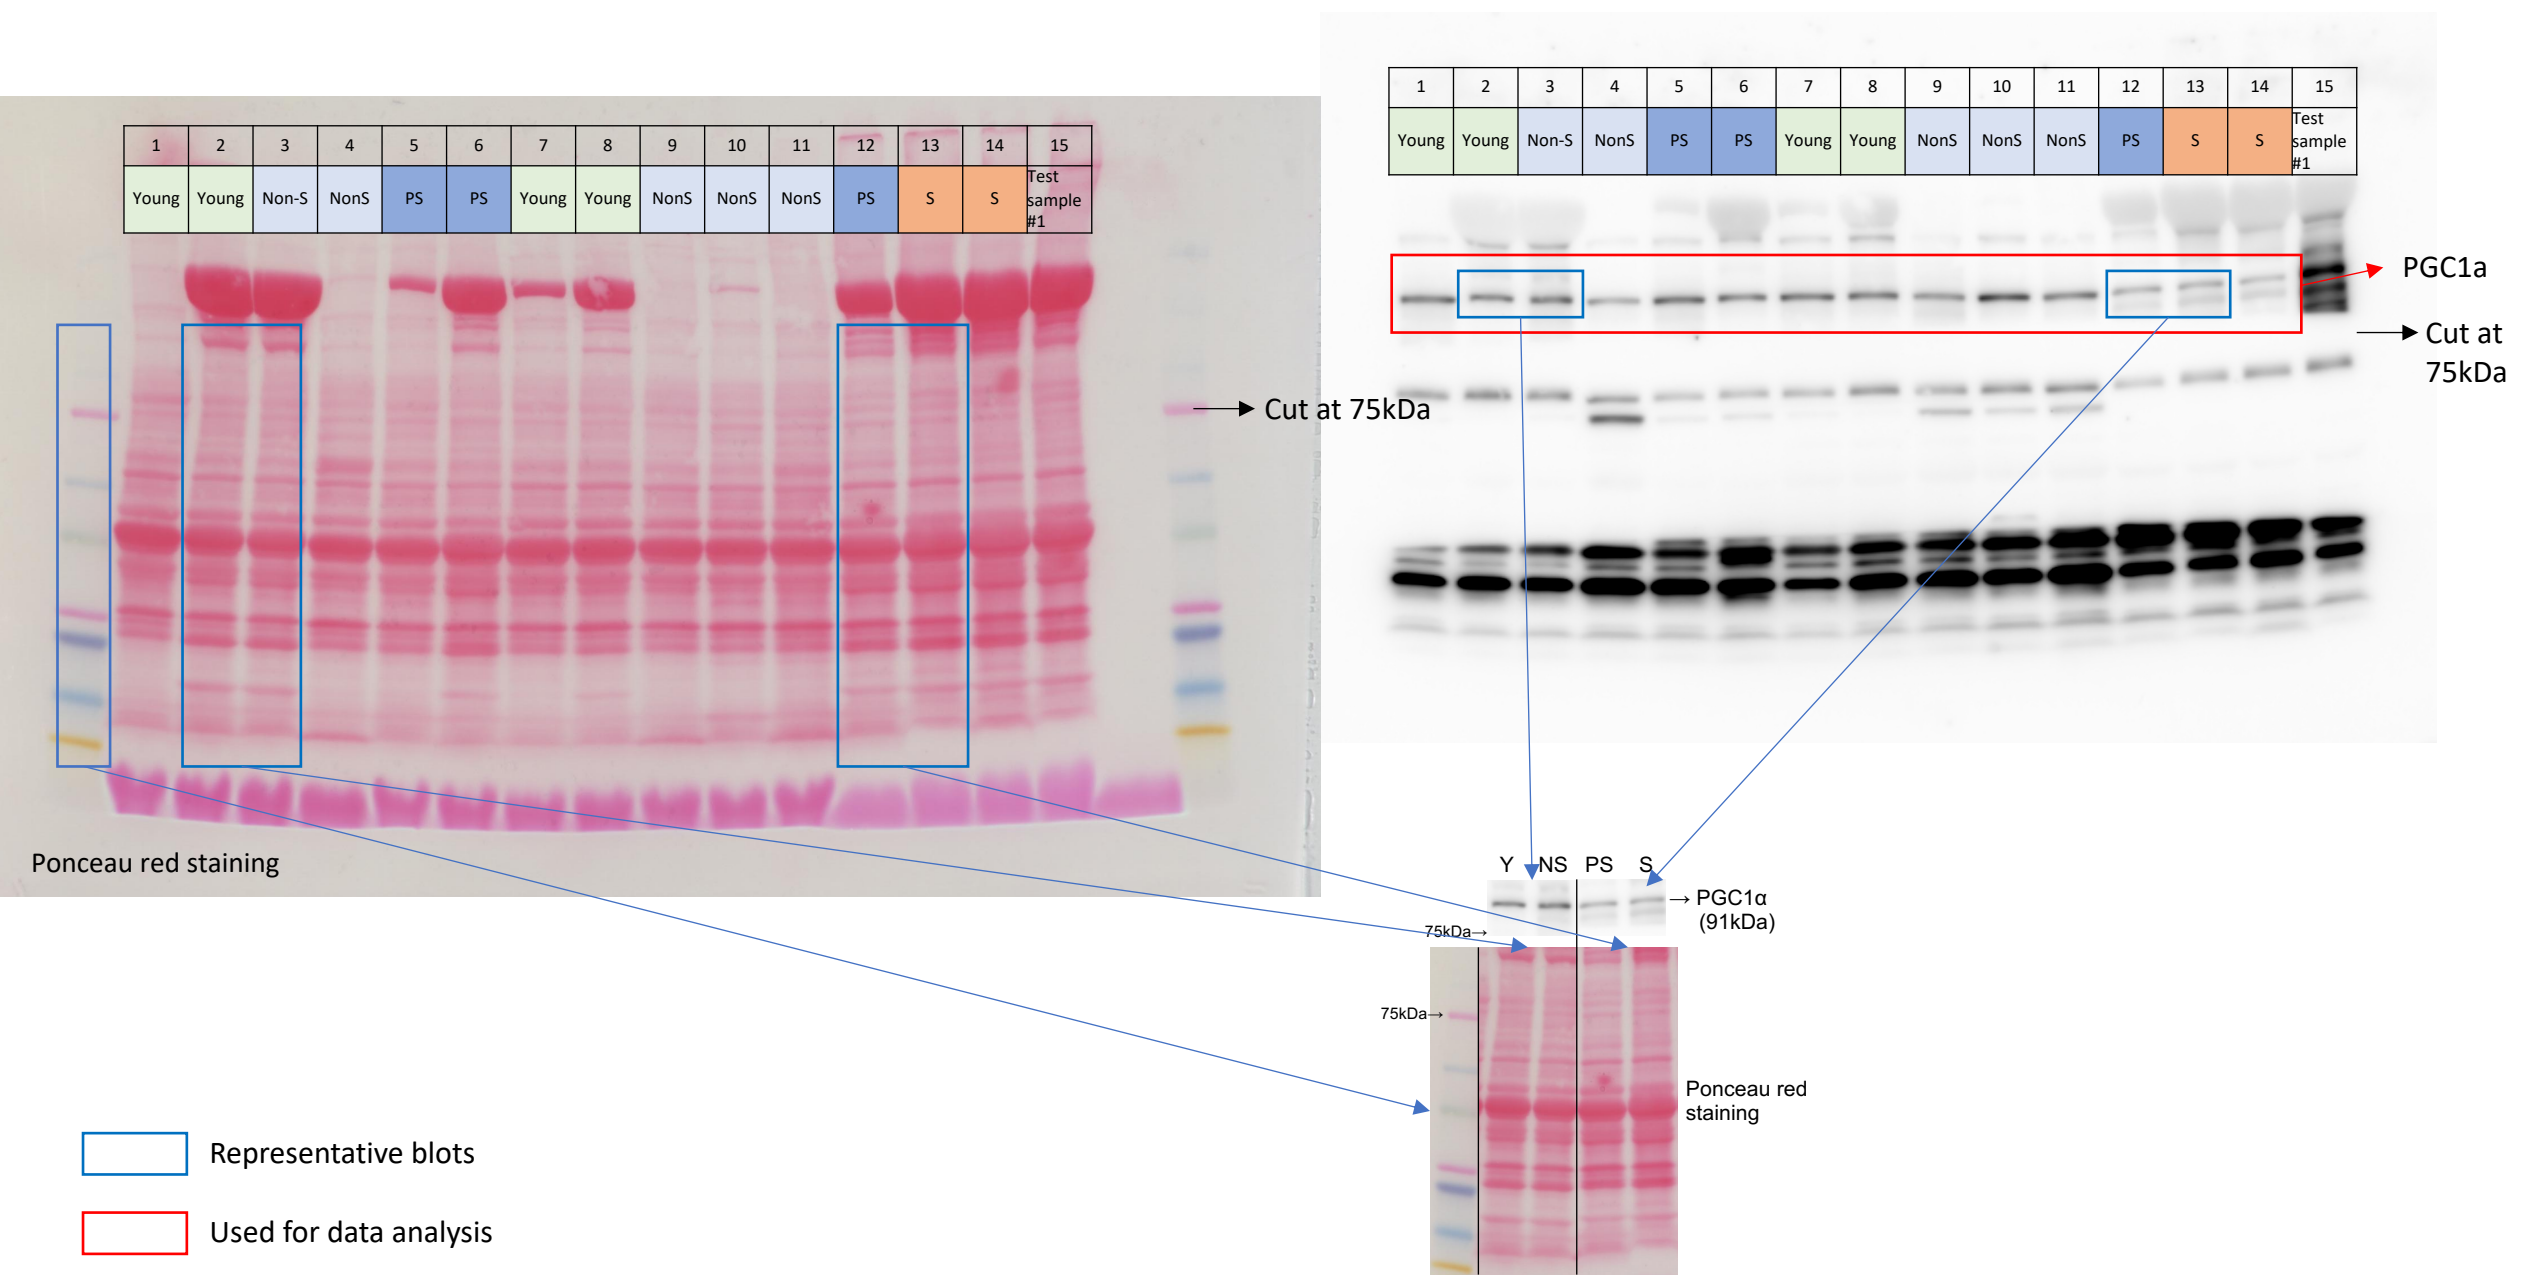

Blots are shown in Fig. 5C

Full unedited blots for Figure 5C  
PGC1a blot 2 & 3

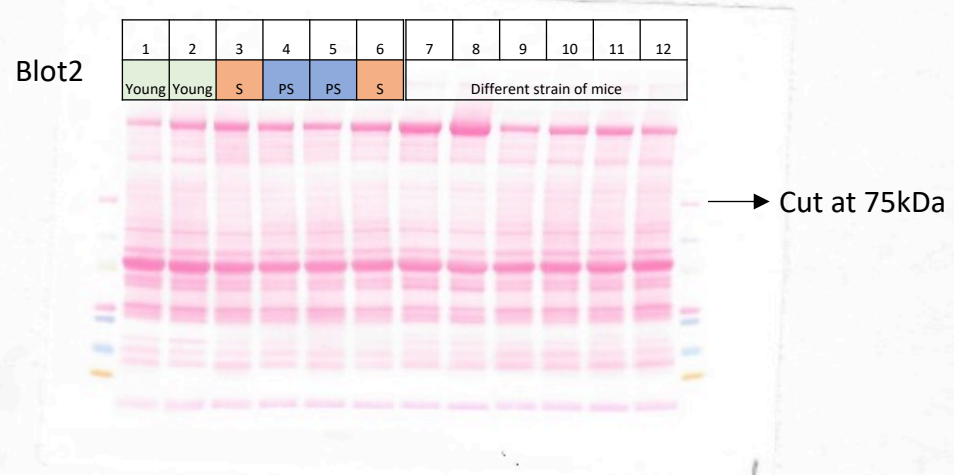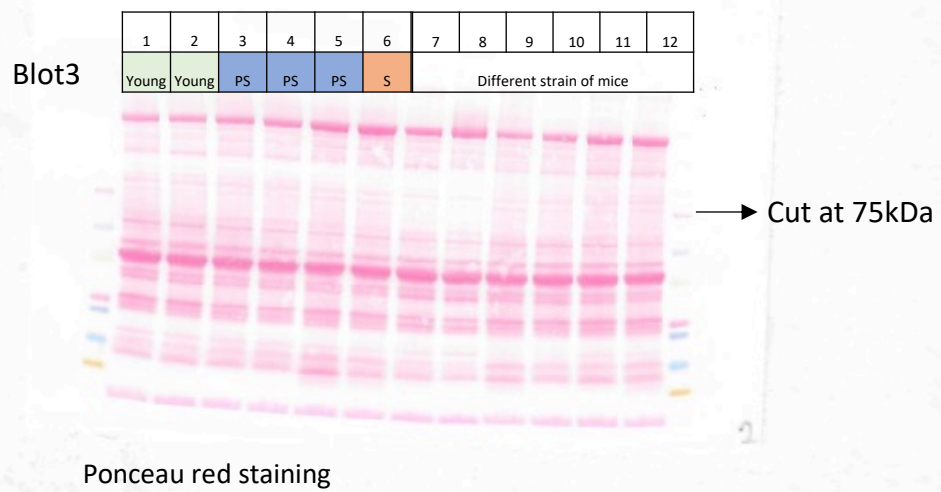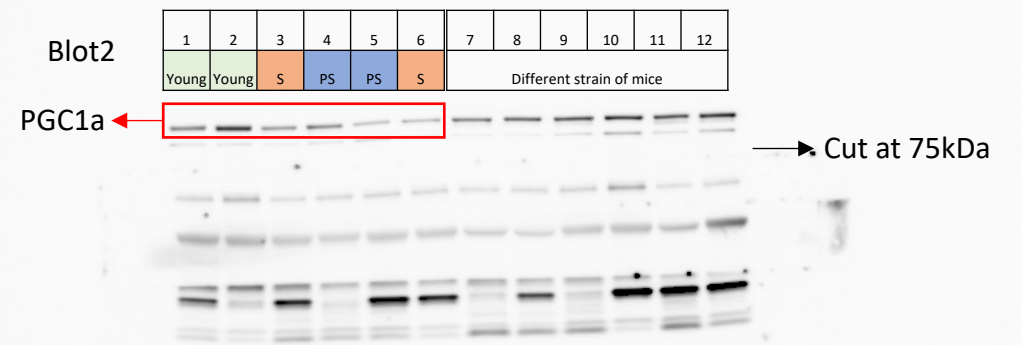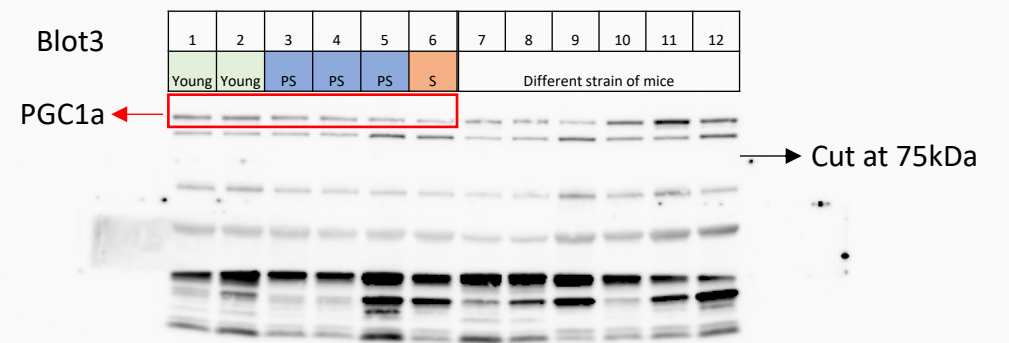

Used for data analysis

Full unedited blots for Figure 6B  
p62 blot 1

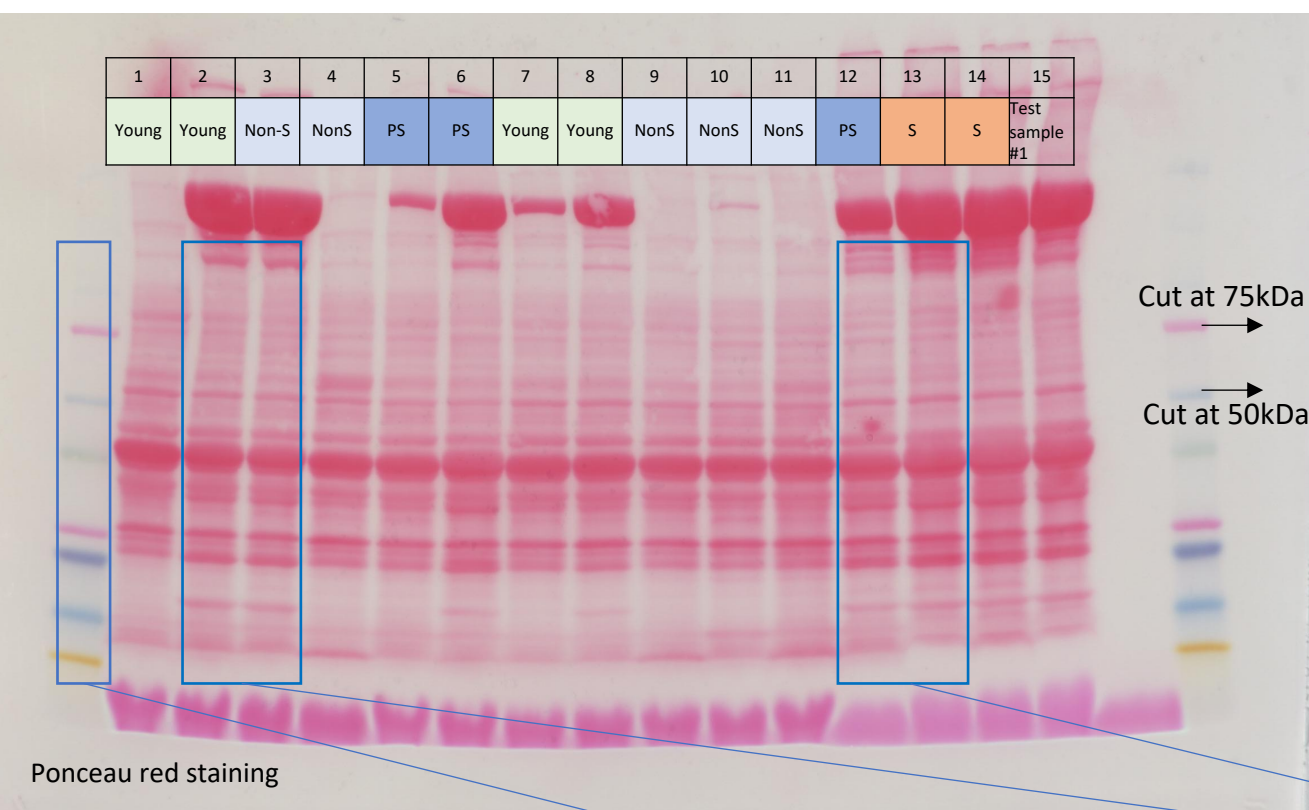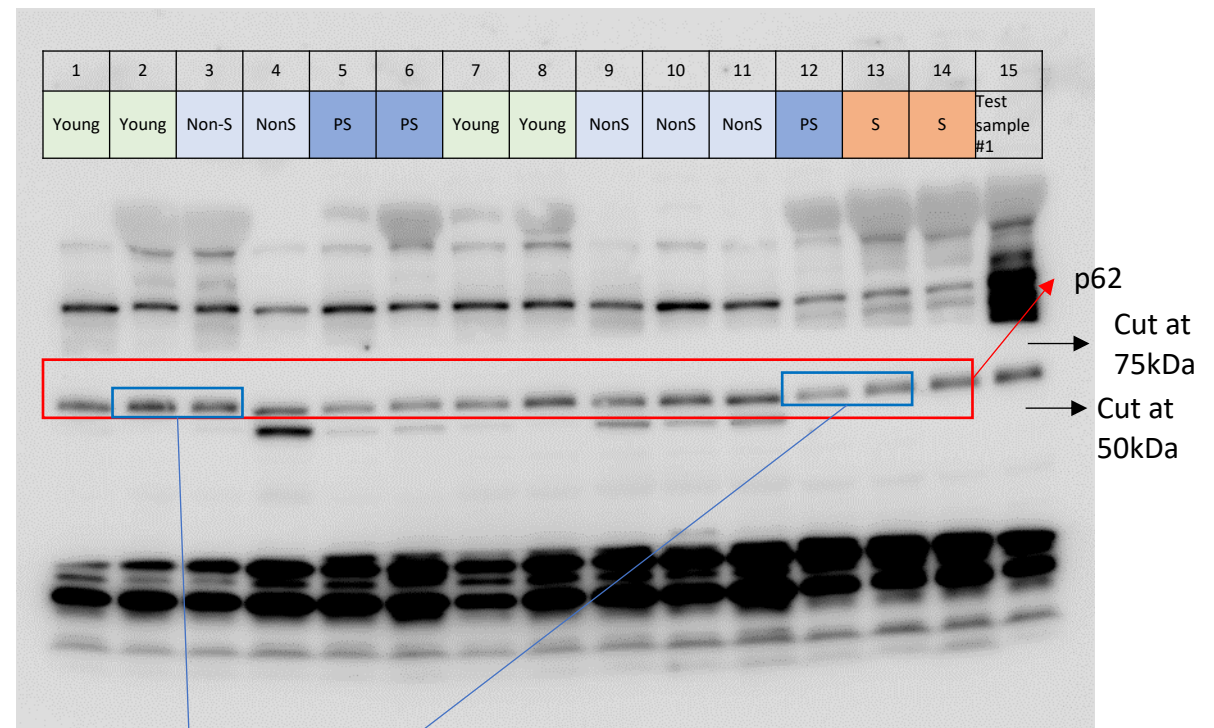

- Representative blots
- Used for data analysis

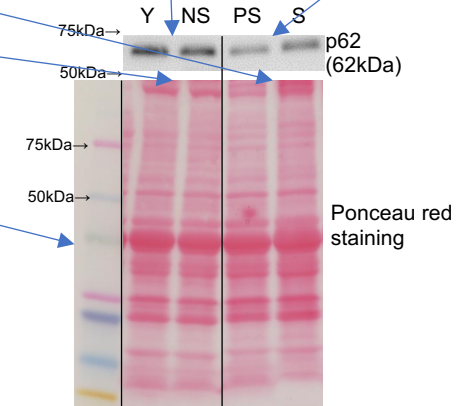

Blots are shown in Fig. 6B

Full unedited blots for Figure 6B  
p62 blot 2 & 3

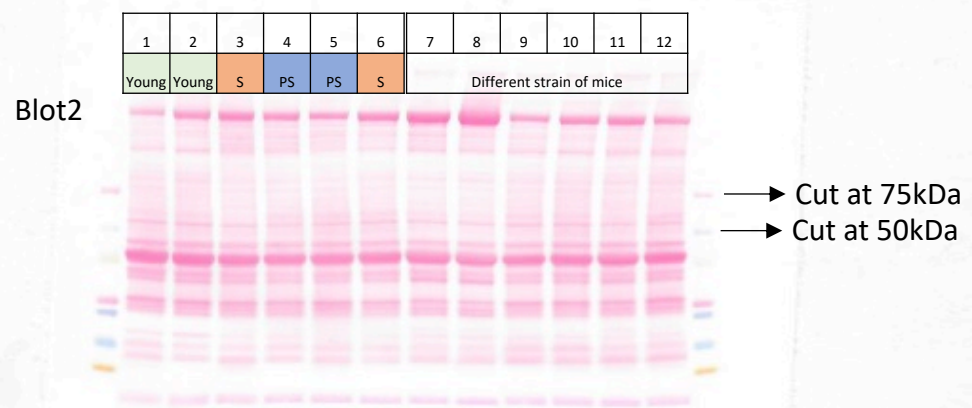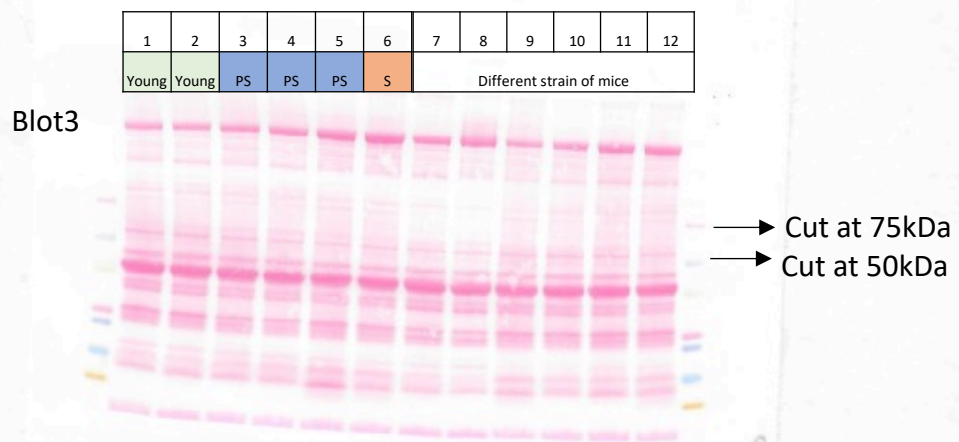

Ponceau red staining

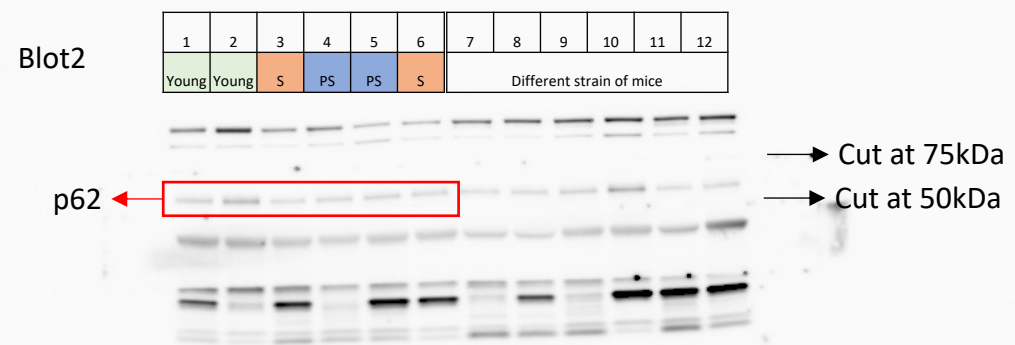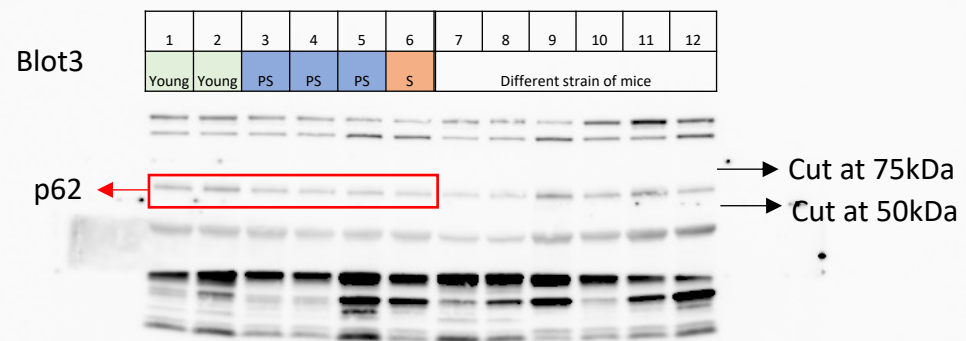

Used for data analysis

**Full unedited blots for Figure 7C**  
**MuRF1 blot1&2**

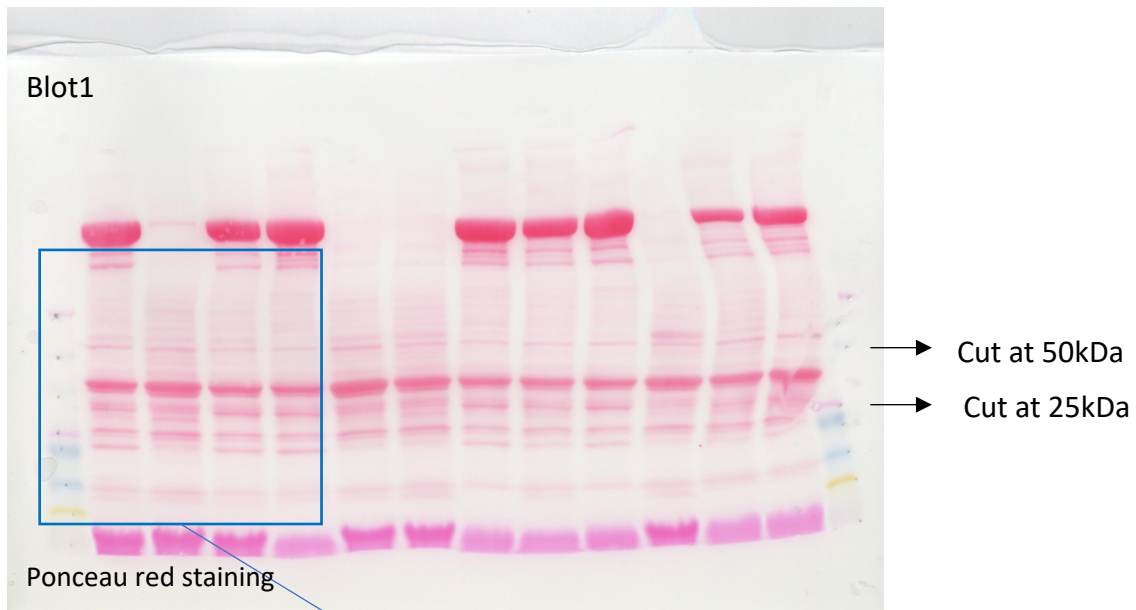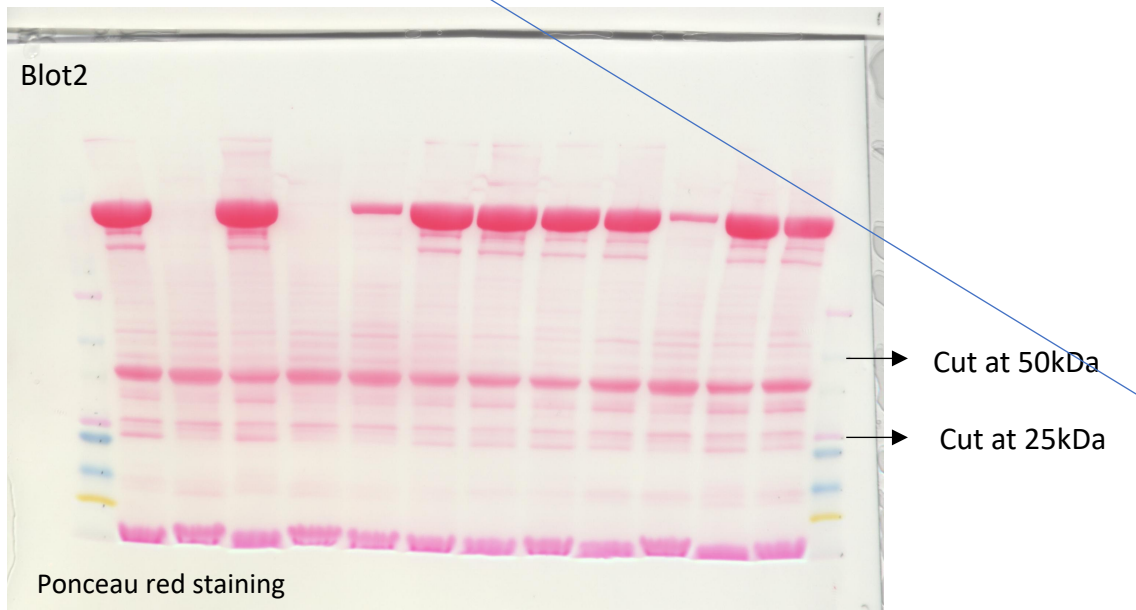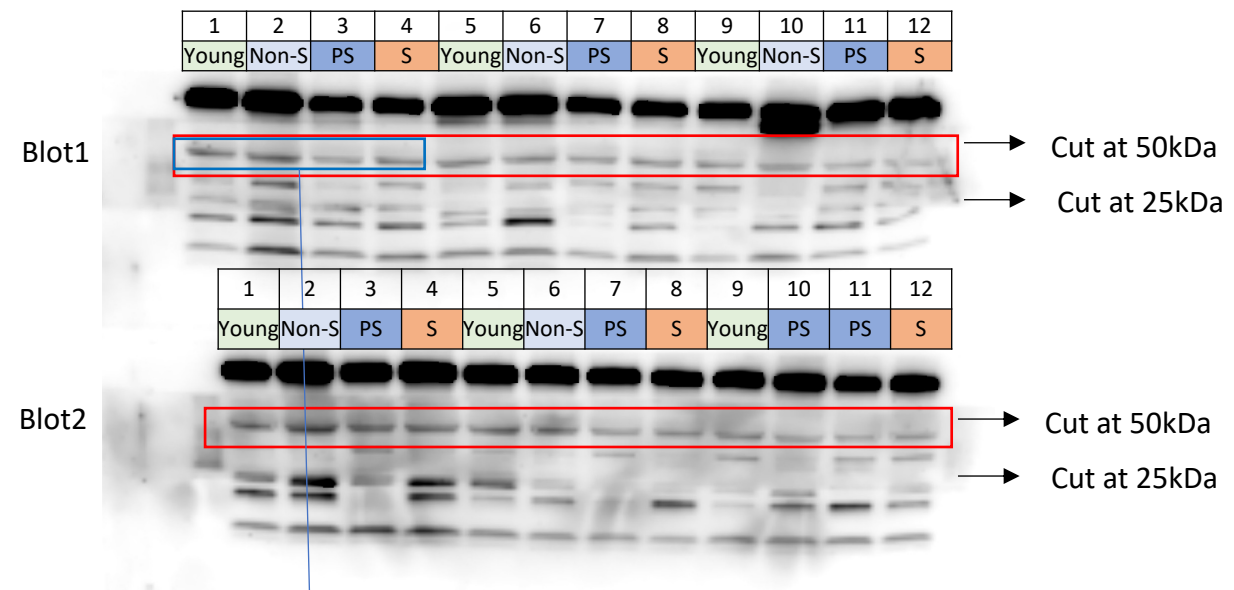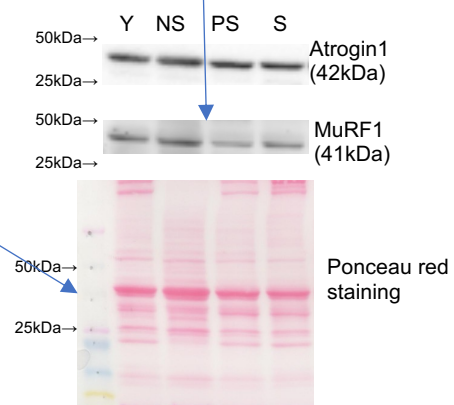

Blots are shown in Fig. 7C

- Representative blots
- Used for data analysis

**Full unedited blots for Figure 7C**  
**Atrogin1 blot1&2 (Stripped and reprobed after MuRF1)**

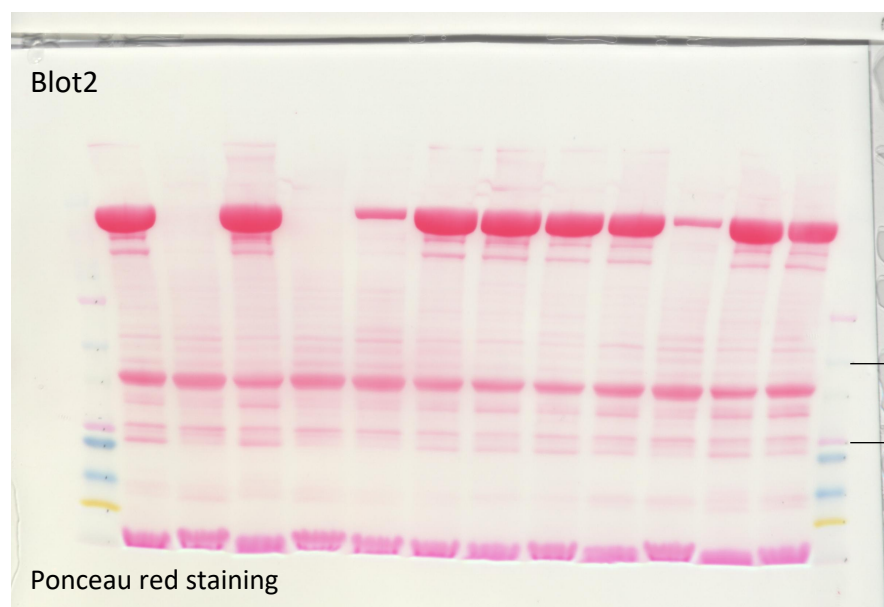

→ Cut at 50kDa  
 → Cut at 25kDa

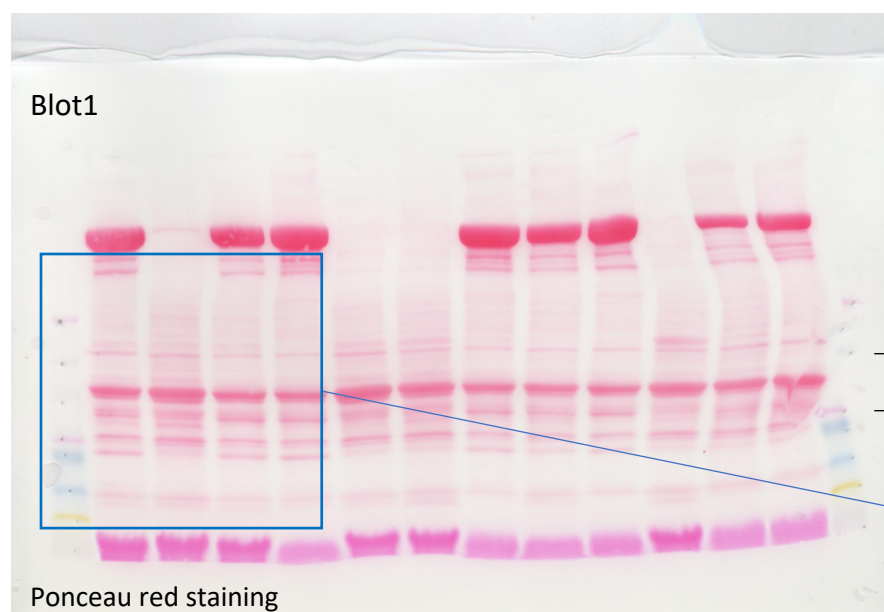

→ Cut at 50kDa  
 → Cut at 25kDa

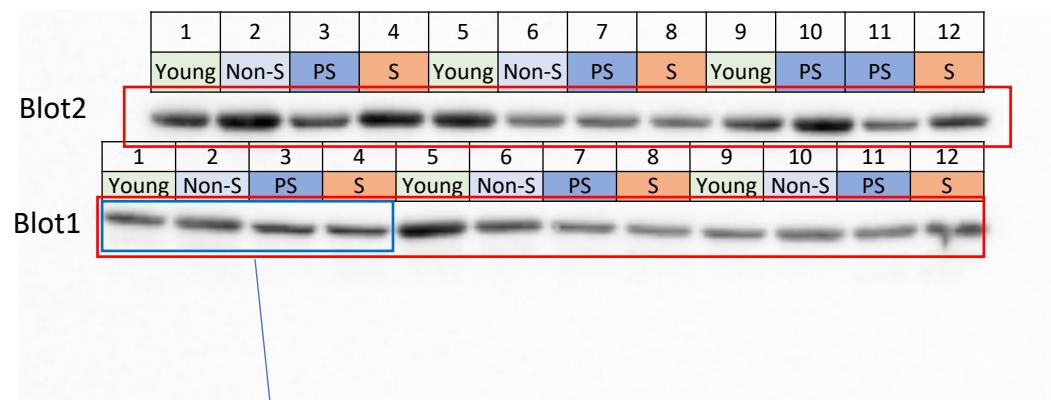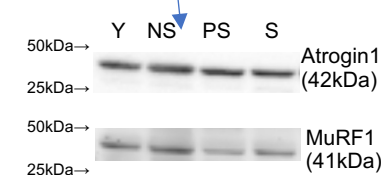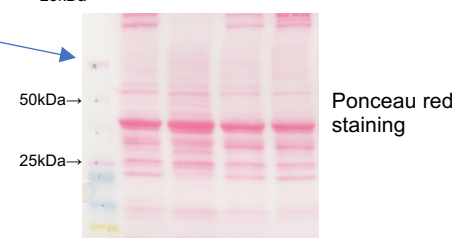

Blots are shown in Fig. 7C

- Representative blots
- Used for data analysis



# Full unedited blots for Supplemental Fig.3I OXPHOS complexes

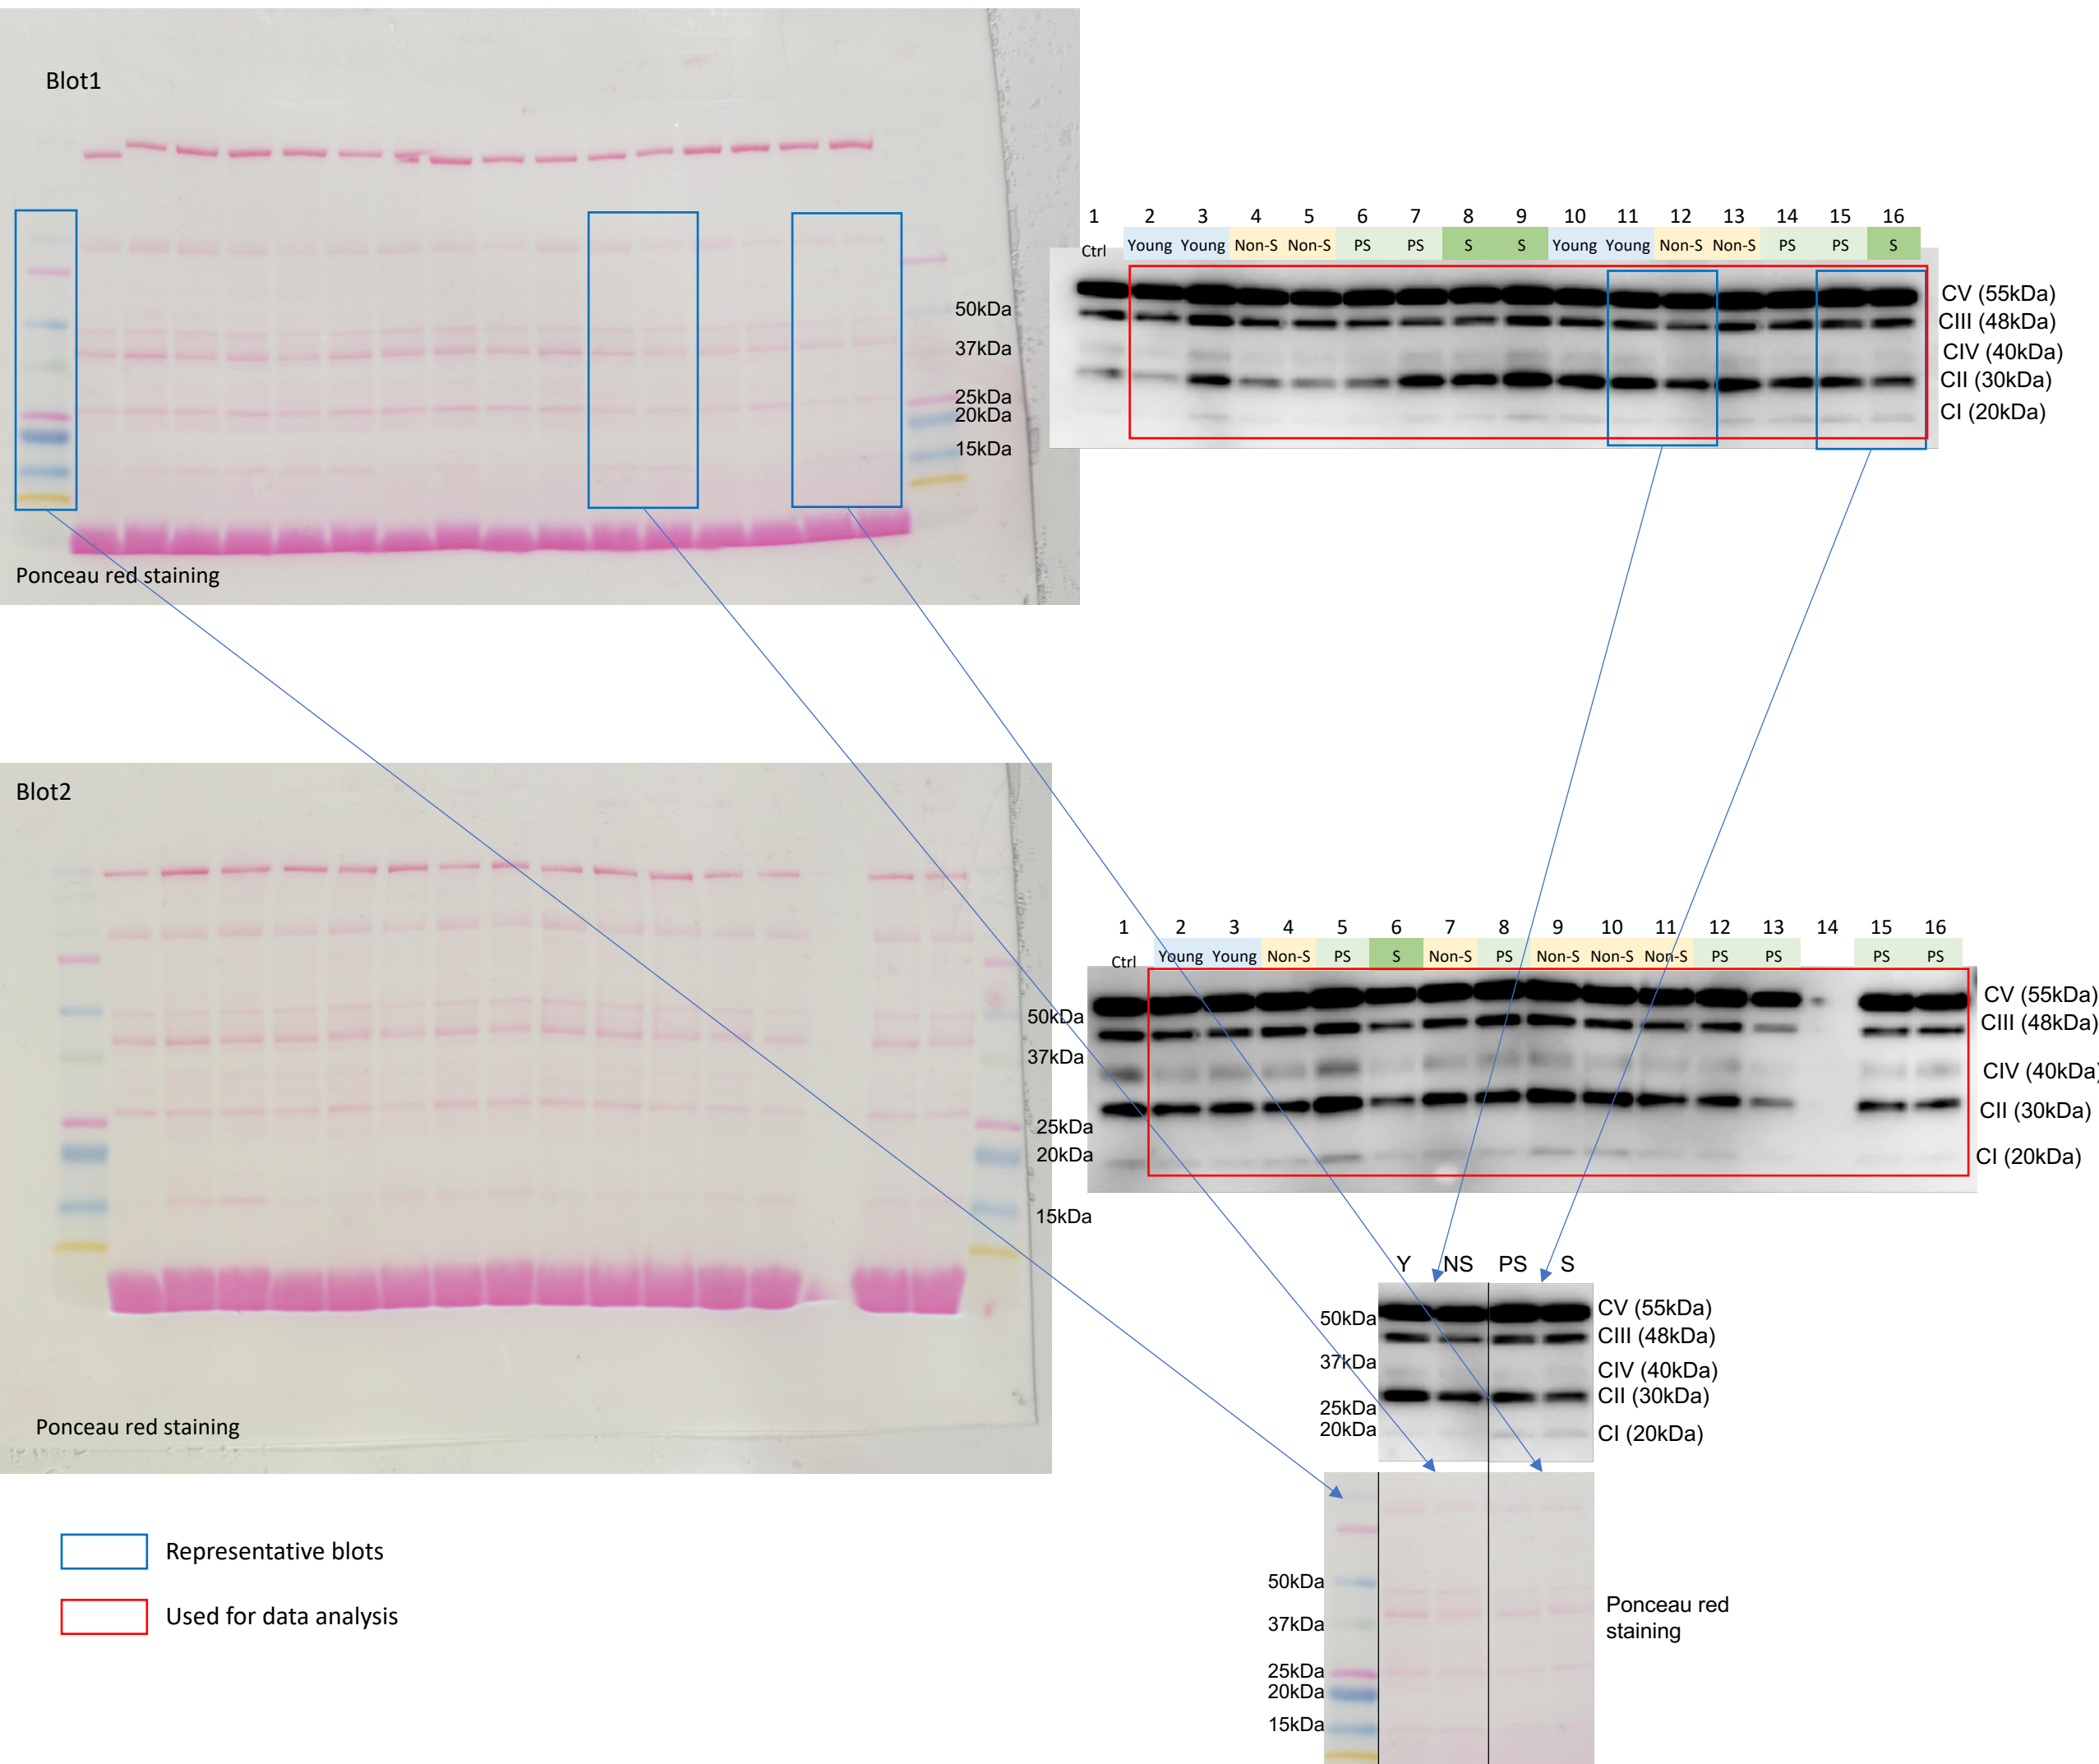

Blots are shown in Supplemental Fig. 3I

Full unedited blots for Supplemental Fig.3J  
PGC1a in females

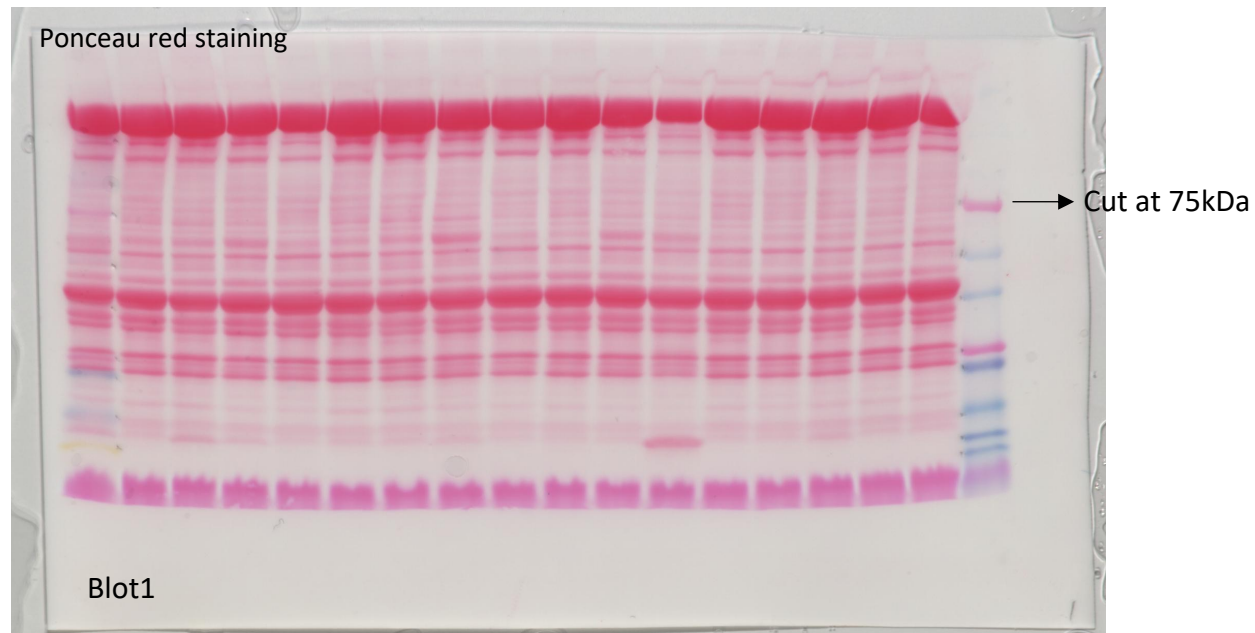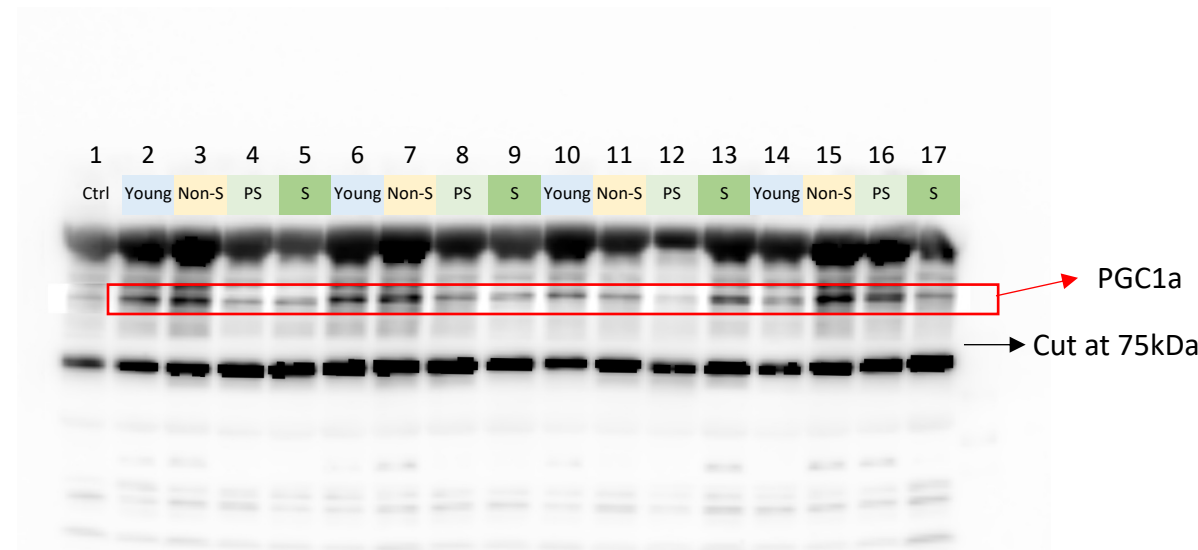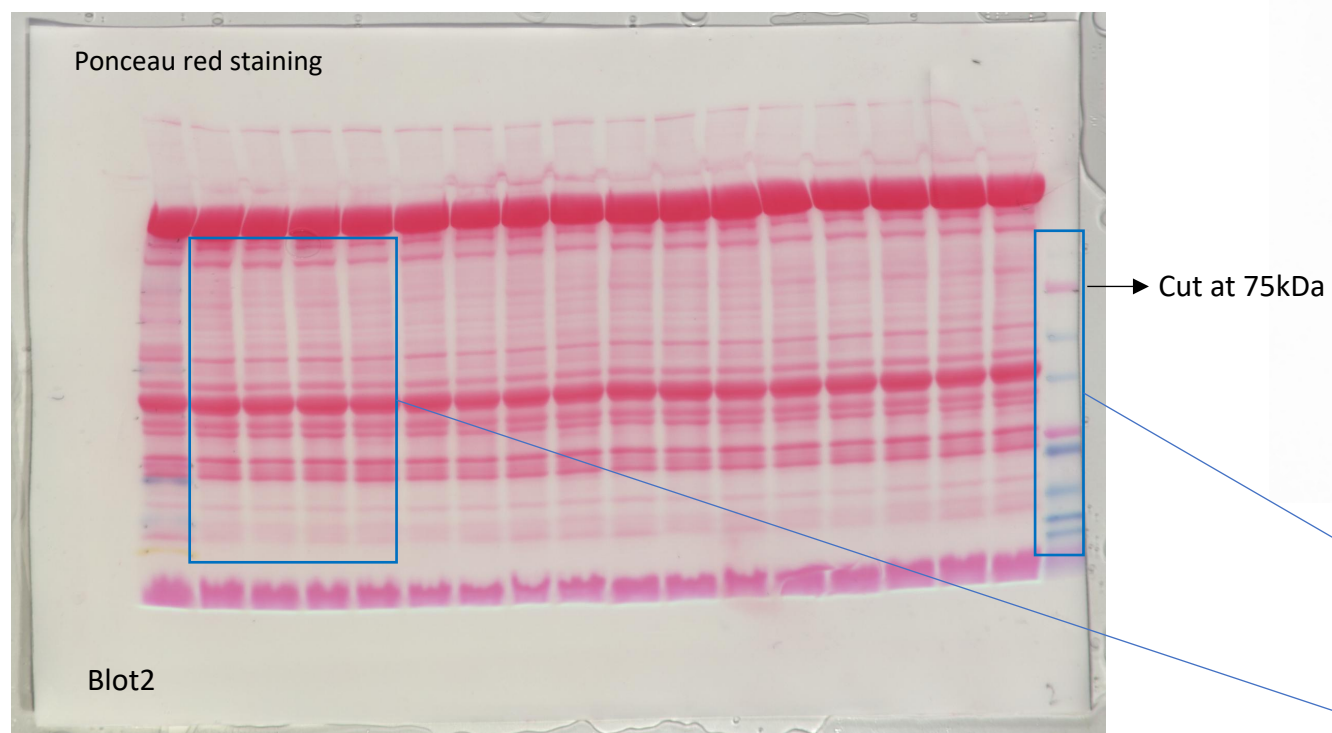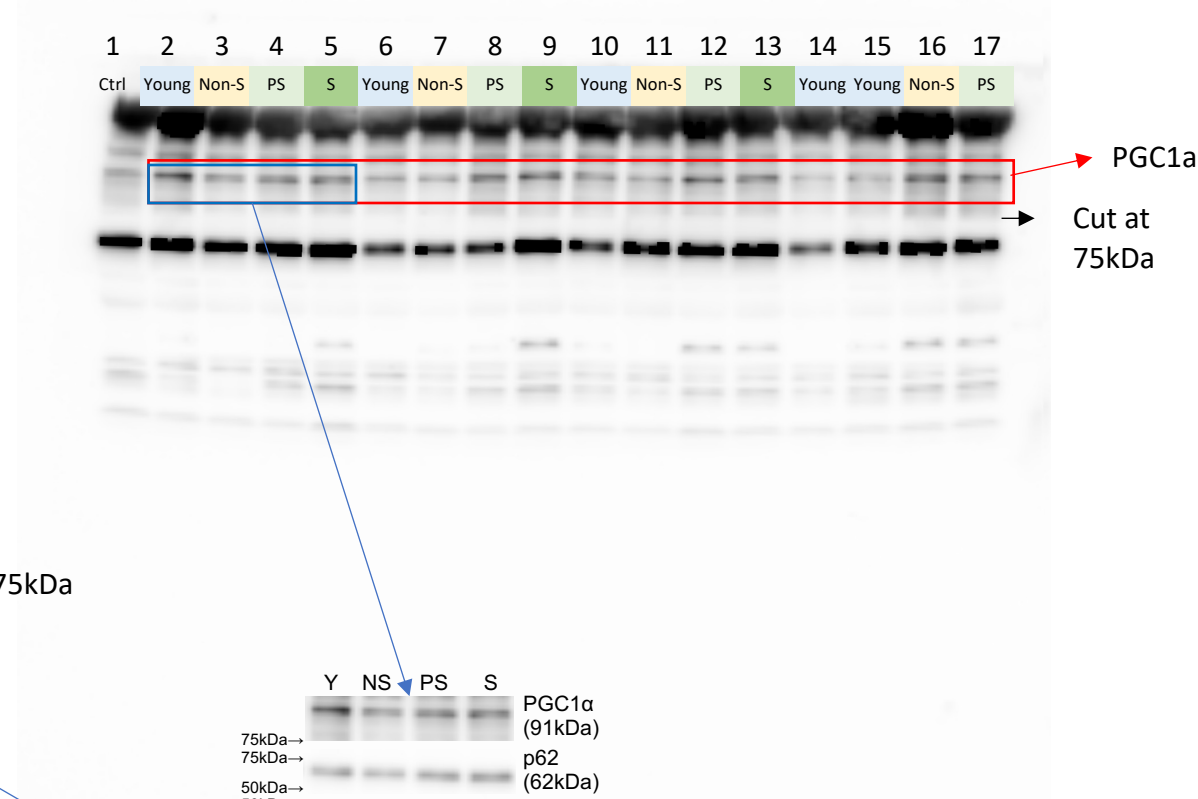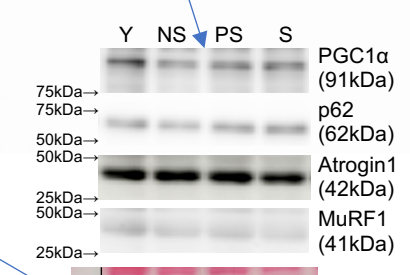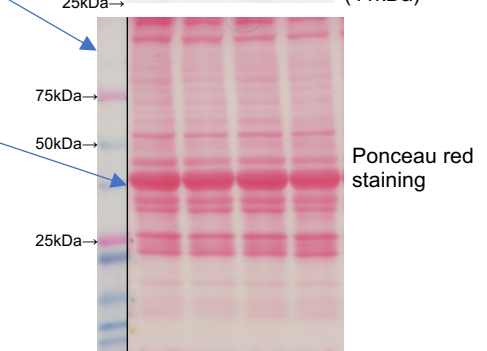

Representative blots

Used for data analysis

Blots are shown in Supplemental Fig. 3J

# Full unedited blots for Supplemental Fig.3J p62 in females

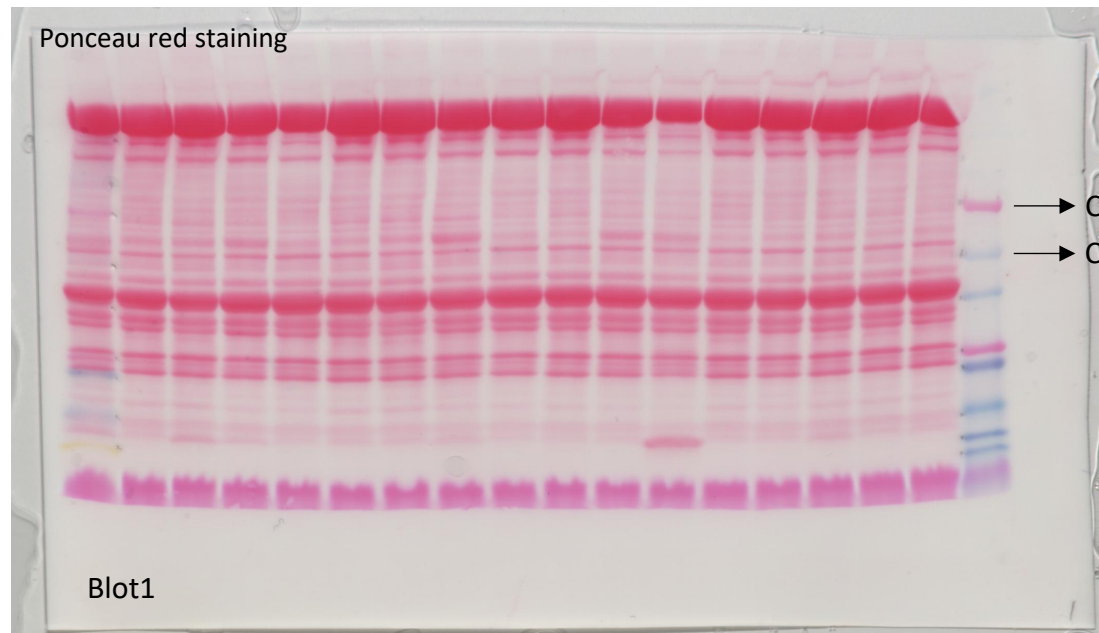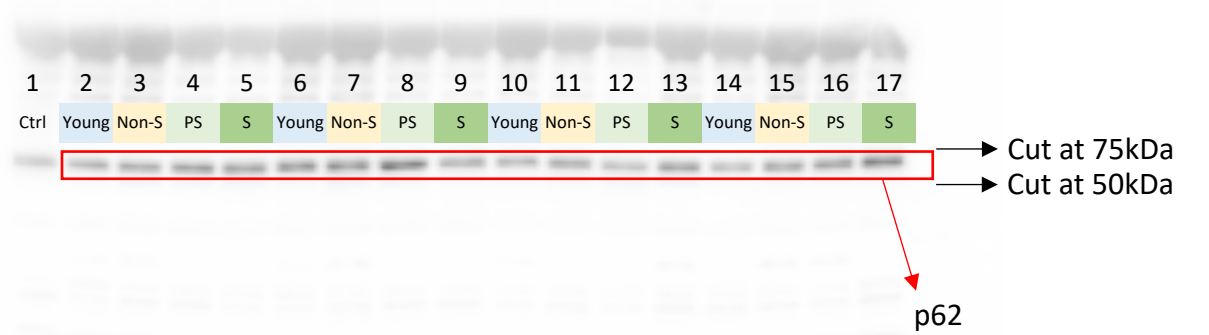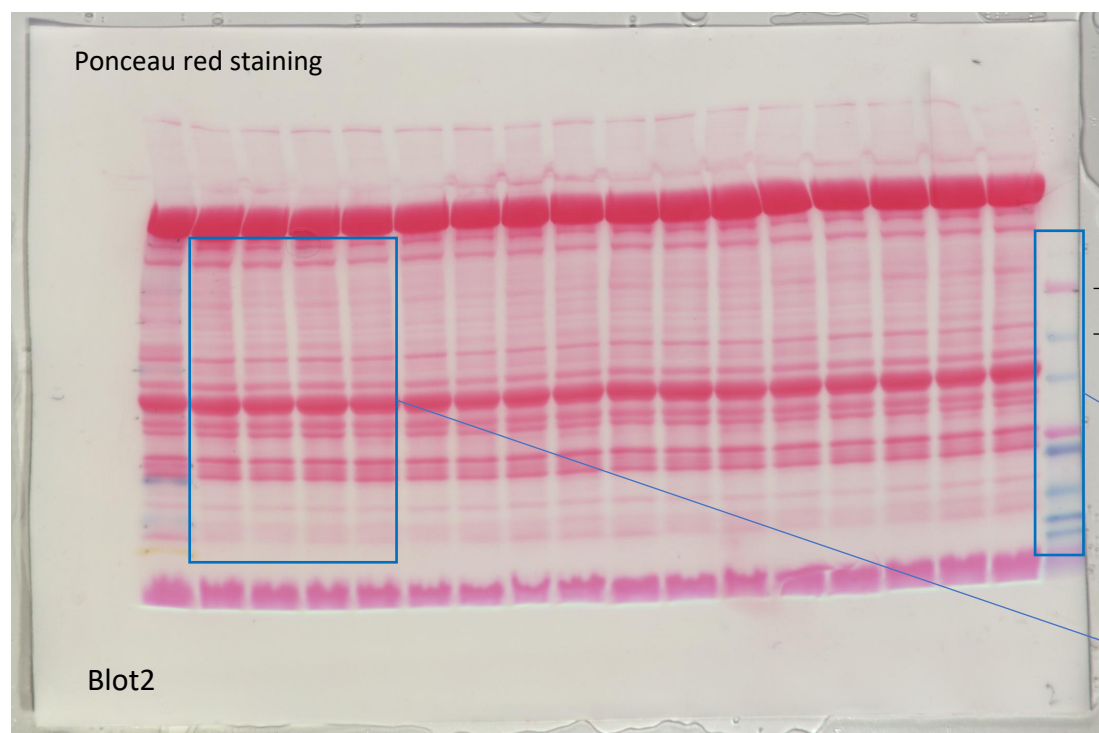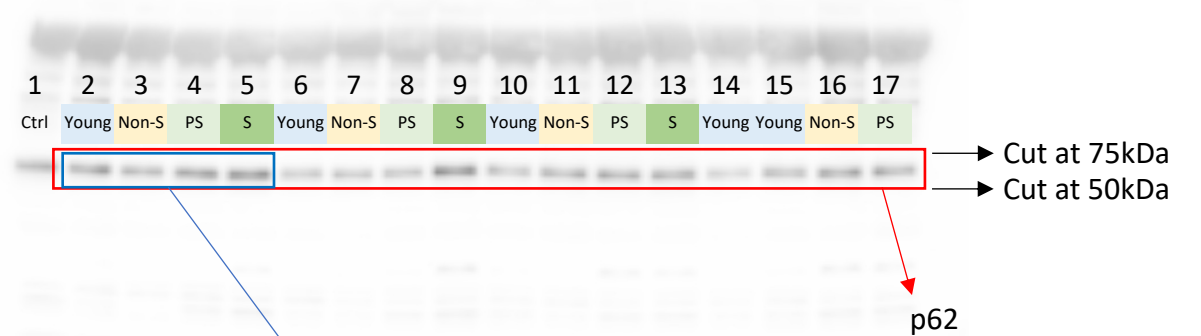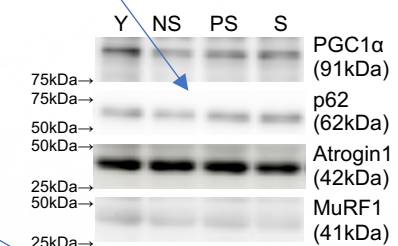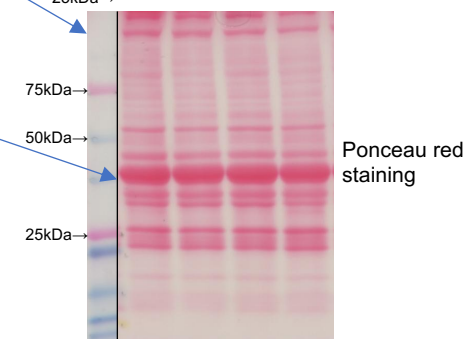

Representative blots

Used for data analysis

Blots are shown in Supplemental Fig. 3J

**Full unedited blots for Supplemental Fig.3J  
MuRF1 in females**

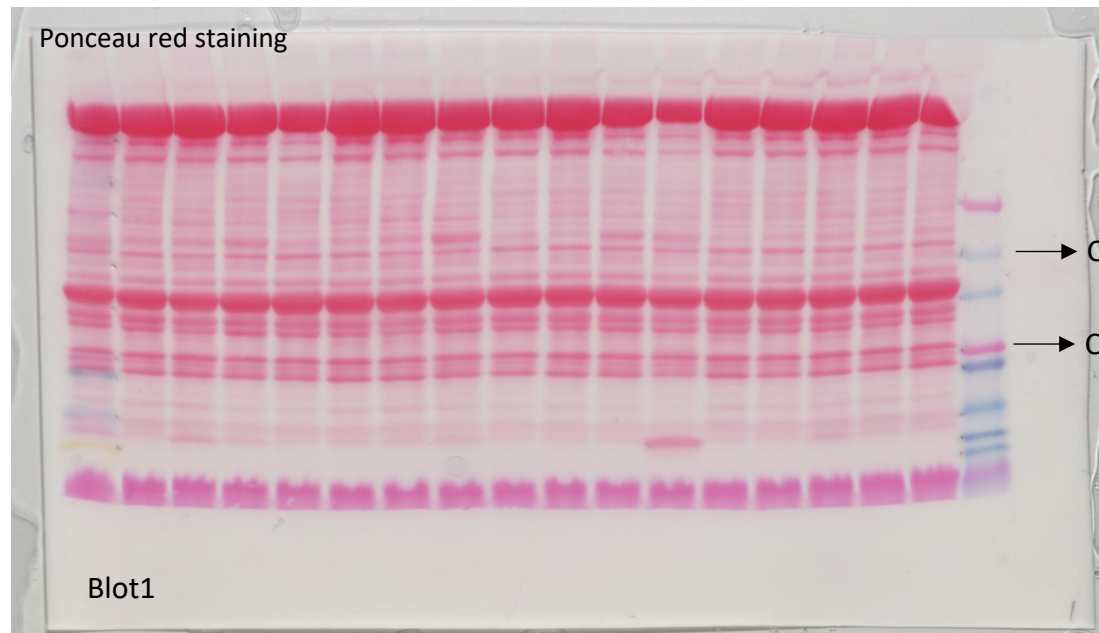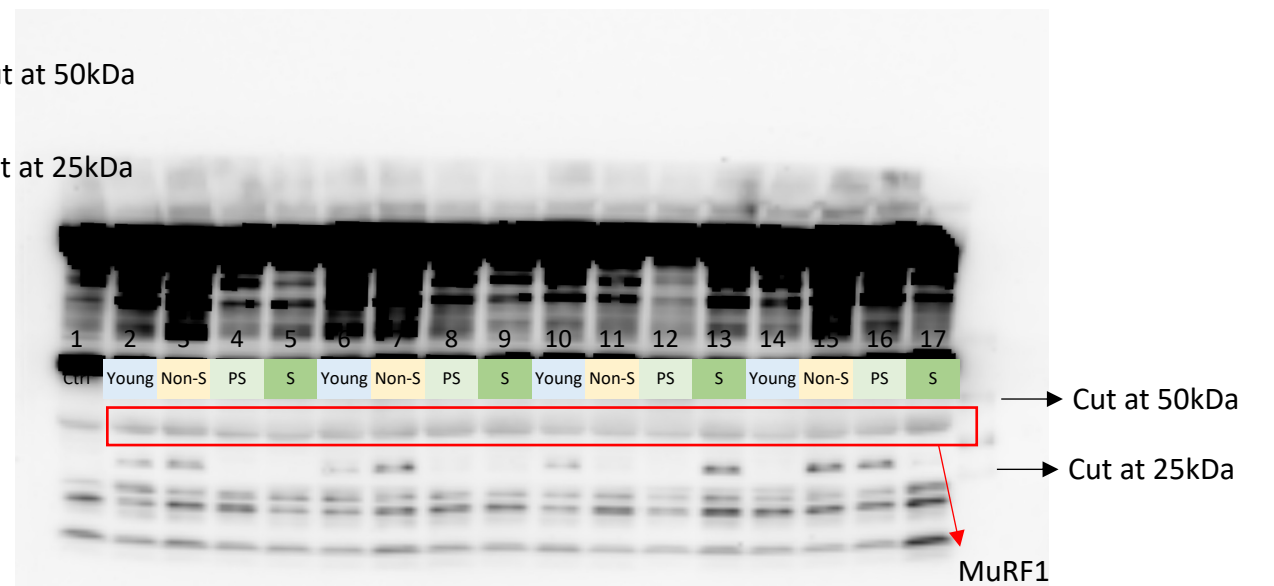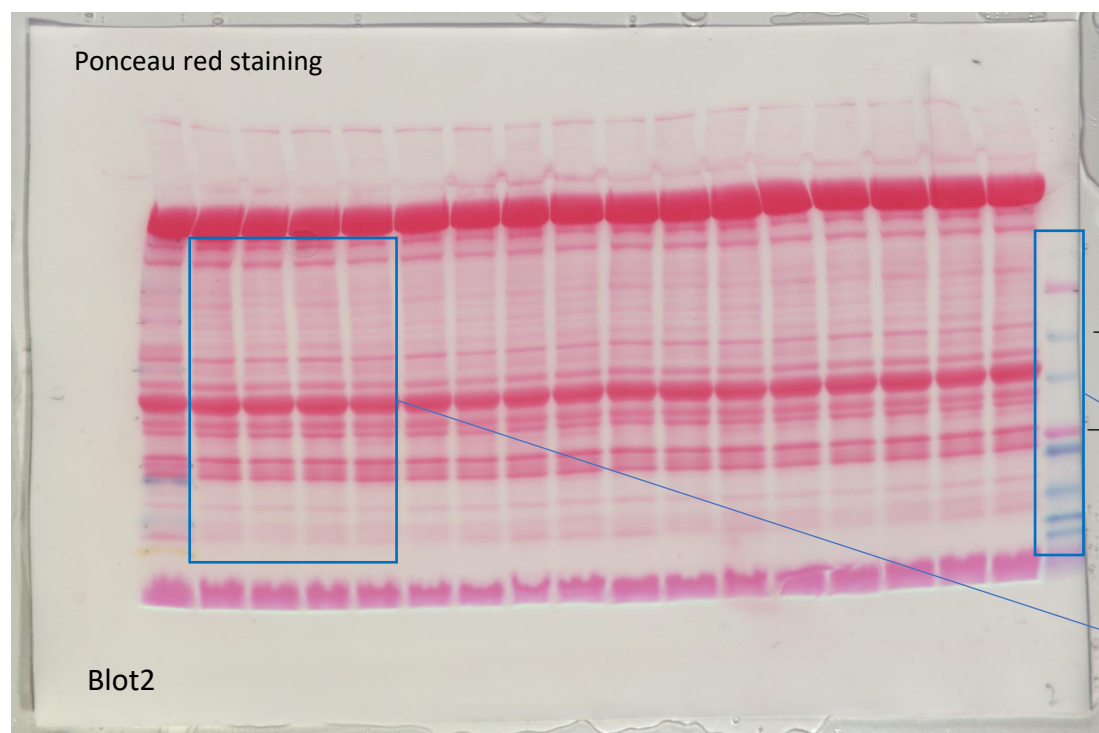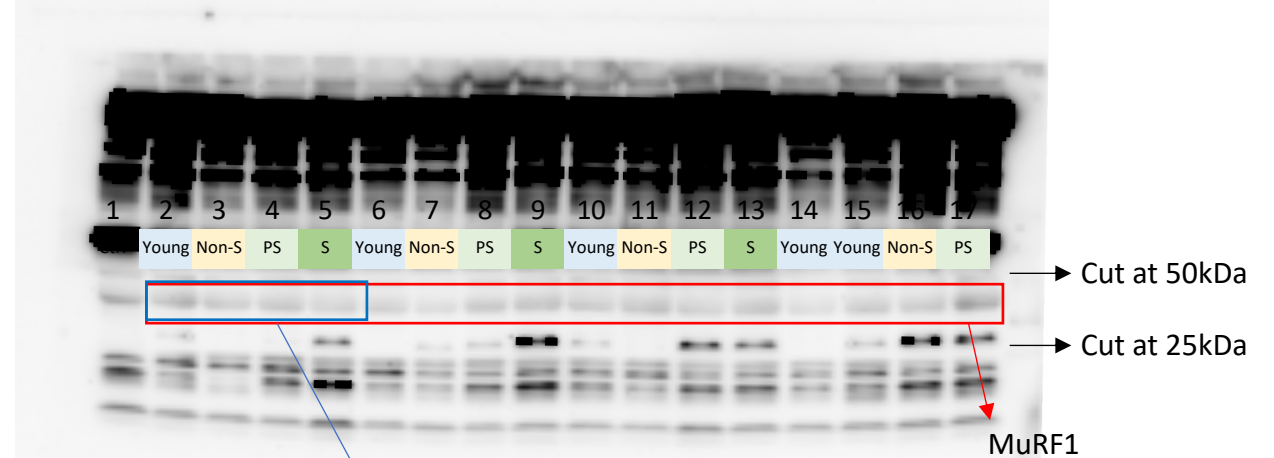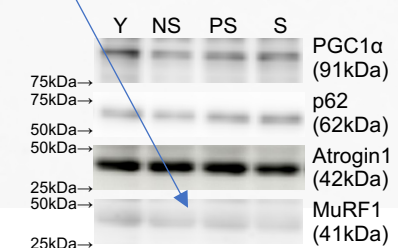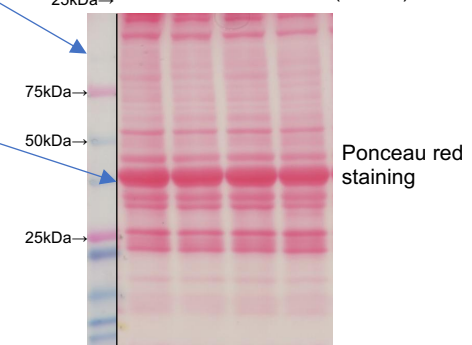

- Representative blots
- Used for data analysis

Blots are shown in Supplemental Fig. 3J

**Full unedited blots for Supplemental Fig.3J**  
**Atrogin1 in females**  
**(Stripped and reprobbed after MuRF1)**

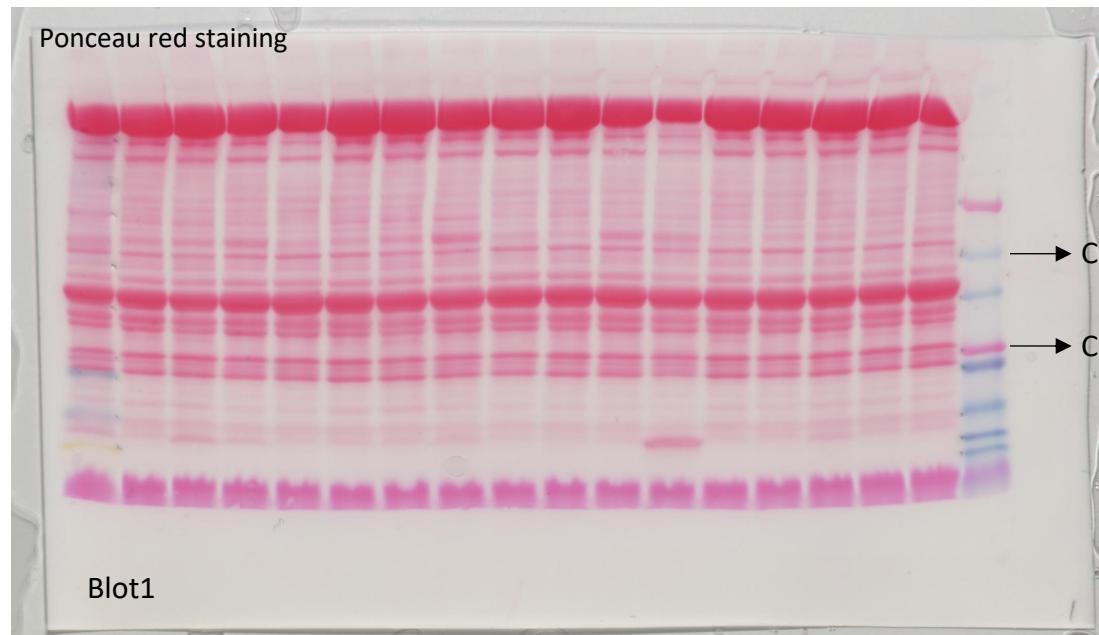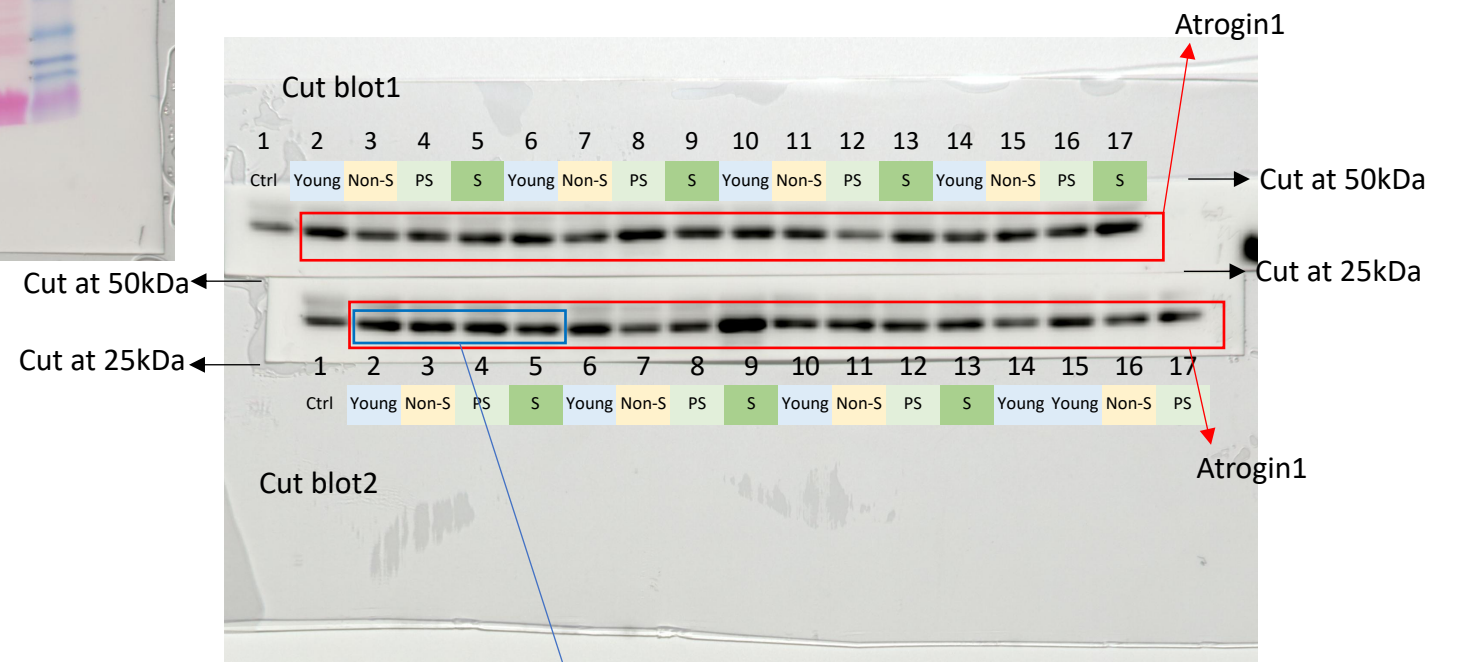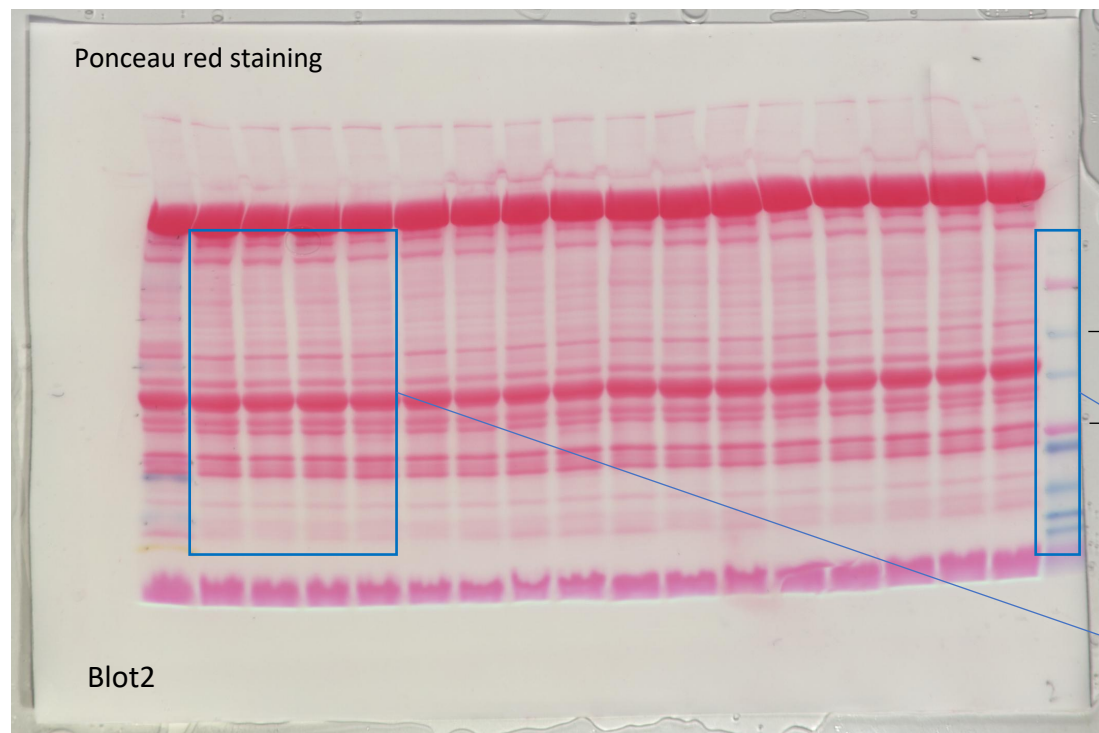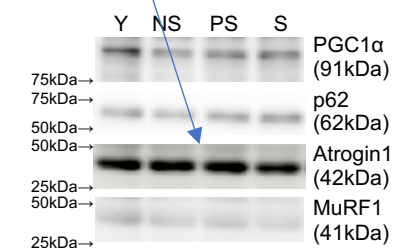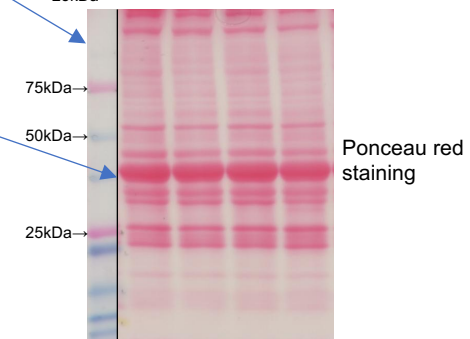

Representative blots

Used for data analysis

Blots are shown in Supplemental Fig. 3J
