# Supplementary material for: Mouse sarcopenia model reveals sex- and age-specific differences in phenotypic and molecular characteristics
Source: JCI journal article supplement (doi:10.1172/jci172890), 2024-06-11
Supplement: sd1 [file 1]

301 Moved Permanently

# Moved Permanently

The document has moved here.
